# Supplementary material for: TAL effectors mediate high-efficiency transposition of the piggyBac transposon in silkworm Bombyx mori L
Source: PubMed Central journal article supplement (PMC4660427; doi:10.1038/srep17172), 2015-11-26
Supplement: srep17172-s1.pdf [file srep17172-s1.pdf]

# TAL effectors mediate high-efficiency transposition of the *piggyBac* transposon in silkworm *Bombyx mori* L.

Lupeng Ye<sup>1</sup>, Zhengying You<sup>1</sup>, Qiuji Qian<sup>1</sup>, Yuyu Zhang<sup>1</sup>, Jiaqian Che<sup>1</sup>, Jia Song<sup>1</sup> &

Boxiong Zhong<sup>1\*</sup>

<sup>1</sup> College of Animal Sciences, Zhejiang University, Hangzhou 310058, P. R. China

\*Corresponding author. Tel:/Fax: +86-571-86971302; E-mail: bxzhong@zju.edu.cn

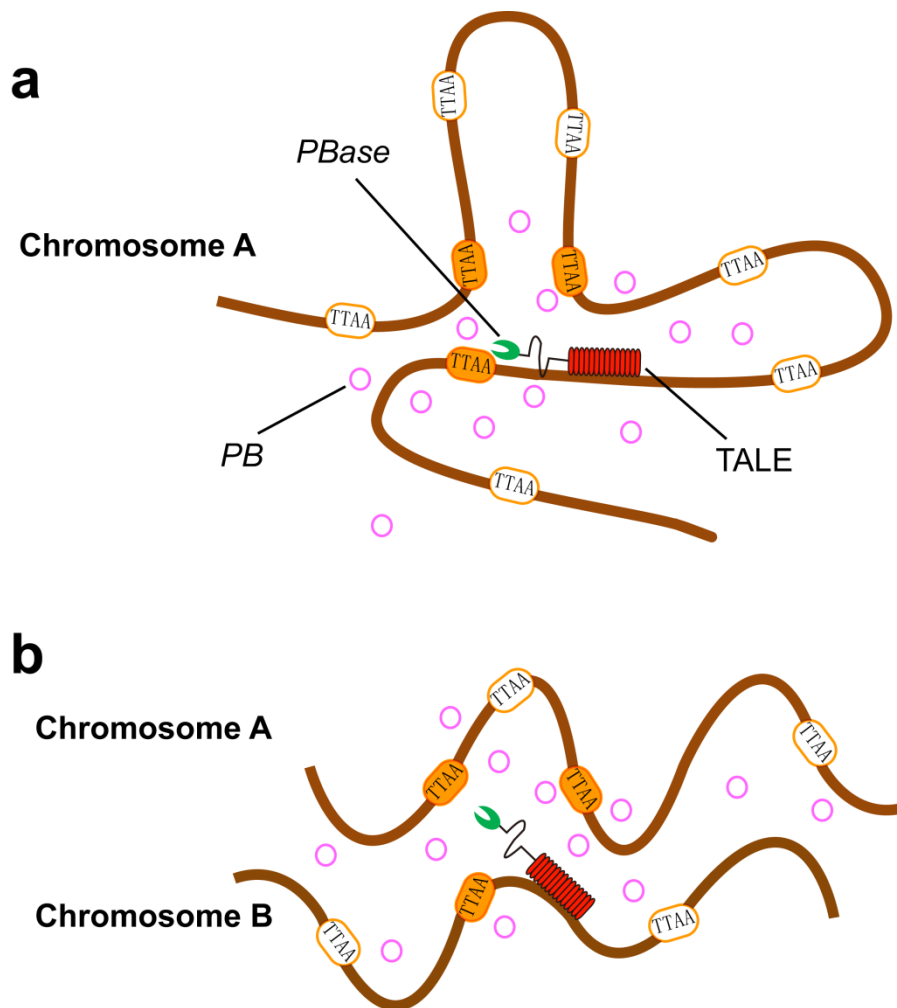

**Supplementary Figure S1.** Three-dimensional TALE-mediated transposition. (a)

The occurrence of *PB* transposition within the same chromosome. (b) The occurrence of *PB* transposition between two different chromosomes. There are many “TTAAs” distributed throughout the genome, and the orange ellipses represent candidate “TTAAs” for transposition. TALE, transcription activator-like effector; *PB*, *piggyBac* transposon; *PBase*, *piggyBac* transposase.

*Fib-L chain gene*

```
5'-AATCACGGAATCCTGTATAGTATATACCGATTGGTCACATAACAGACCACT
AAA ATGAAGCCTATATTTTGGTATTACTCGTCGCTACA GTAAGTAATT TTAA
      Exon 1           TALE binding site
CTTTTTCAAATTTATTTAGAATATATGTATATATATACTCACC -3'
      Intron 1
```

**Supplementary Figure S2.** The target binding site of TALE. The target binding site of TALE is located on the first exon of the *Fibroin light chain (Fib-L)* gene (in the blue frame). The sequence in red is the recognition site of the engineered TALE; “TTAA” in the red frame is the candidate integration site of the *PB* transposon. The sequence above the blue dashed line is the first intron of the *Fib-L* gene (partial sequence).

**Supplementary Figure S3.** Amino acid sequence of the TALE-PBase fusion protein

```
MAPKKKRKVGIHGVPMVDLRTLGYSSQQQEKIKPKGGRQSR SITKRWVWV
GLHMPTSSLVAAPCSPWHGRRQVPGHDSALPEATHEAIVGVGKQWSGARALE
ALLTVAGELRGPPLQLDTGQLLKIARKGGVTAVEAVHAWRNALTGAPLNLTPE
QVVAIASNGGGKQALETVQRLLPVLCQAHGLTPEQVVAIASNIGGKQALETV
QRLLPVLCQAHGLTPEQVVAIASHDGGKQALETVQRLLPVLCQAHGLTPEQV
```

VAIASNGGGKQALETVQRLLPVLCQAHGLTPEQVVAIASHDGGKQALETVQR  
 LLPVLCQAHGLTPEQVVAIASNNGGKQALETVQRLLPVLCQAHGLTPEQVVAI  
 ASNGGGKQAFGNRTTMLPVLCQAHGLTPEQVVAIASHDGGKQALETVQRLLP  
 VLCQAHGLTPEQVVAIASNNGGKQALETVQRLLPVLCQAHGLTPEQVVAIAS  
 HDGGKQALETVQRLLPVLCQAHGLTPEQVVAIASNNGGGKQALETVQRLLPVL  
 CQAHGLTPEQVVAIASNIGGKQALETVQRLLPVLCQAHGLTPEQVVAIASHDG  
 GKQALETVQRLLPVLCQAHGLTPEQVVAIASNIGGKQALETVQRLLPVLCQA  
 HGLTPEQVVAIASNNGGKQALETVQRLLPVLCQAHGLTPEQVVAIASNNGGGRP  
 ALESIVAQLSRPDPALAAALTNDHLVRWPASADDPWMLKGLPHAPALIKRT  
 NRRIPERTSHRVAGSMGCSLDDEHILSALLQSDDELVGEDSDSEISDHVSEDDV  
 QSDTEEFIDEVHEVQPTSSGSEILDEQNVIEQPGSSLASNRILTLPQRTIRGKN  
 KHCWSTSKSTRRSRVSALNIVRSQRGPTRMCRNIYDPLLCFKLFFTDEIISEIVK  
 WTNAEISLKRRESMTGATFRDTNEDEIYAFFGILVMTAVRKDNHMSTDDLFDR  
 SLSMVYVSVMSRDRDFDLIRCLRMDDKSIRPTLRENDVFTPVRKIWDLFIHQCI  
 QNYTPGAHLTIDEQLLGFGRGCPFRMYIPNKPSKYGIKILMMCDSGTKYMING  
 MPYLGRGTQTNGVPLGEYYVKELSKPVHGSCRNITCDNWFTSIPLAKNLLQE  
 PYKLTIVGTVRSNKREIPEVLKNSRSRVPVGTSMFCFDGPLTLVSYKPKPAKMV  
 YLLSSCEDEDASINESTGKPMVMYYNQTKGGVDTLDMCSVMTCRSRKTNR  
 WPMALLYGMINIACINSFIIYSHNVSSKGEKVQSRKKFMRNLYMSLTSSFMRK  
 RLEAPTLKRYLRDNISNILPNEVPGTSDDSTEPEVMKKRTYCTYCPSKIRKAN  
 ASCKKCKKVICREHNIDMCQSCF\*

SV40 NLS  
 TALE  
 PBase

**Supplementary Table S1. Statistical analysis of silkworm transposition efficiency  
 in previous studies**

| <b>References</b><br>(see last<br>page) | <b>Authors</b><br><b>and</b><br><b>publish</b><br><b>time</b> | <b>Mating methods</b><br><b>described in the</b><br><b>papers</b> | <b>Transposition</b><br><b>efficiency in the</b><br><b>papers (%)</b> | <b>Transposition</b><br><b>efficiency after</b><br><b>calibration (%)</b> |
|-----------------------------------------|---------------------------------------------------------------|-------------------------------------------------------------------|-----------------------------------------------------------------------|---------------------------------------------------------------------------|
| 1                                       | Tamura et<br>al., 2000                                        | G0 moths are sibling                                              | 0.7 (3/424)                                                           | 0.7                                                                       |
|                                         |                                                               | mated or backcrossed                                              | 3.9 (9/230)                                                           | 3.9                                                                       |

|    |                      |                                                   |               |                   |
|----|----------------------|---------------------------------------------------|---------------|-------------------|
| 2  | Tomita et al., 2003  | G0 moths are intercrossed                         | 25.8 (42/163) | 12.9 <sup>a</sup> |
|    |                      |                                                   | 18.3 (24/131) | 9.15 <sup>a</sup> |
|    |                      |                                                   | 27.6 (35/127) | 13.8 <sup>a</sup> |
| 3  | Imamura et al., 2003 | G0 moths are sibling mated                        | 2.7 (3/112)   | 1.35 <sup>a</sup> |
|    |                      |                                                   | 2.5 (3/121)   | 1.25 <sup>a</sup> |
|    |                      |                                                   | 11.2 (19/169) | 5.06 <sup>a</sup> |
| 4  | Adachi et al., 2006  | G0 moths are mated within the same family         | 18.3 (46/251) | 9.1 <sup>a</sup>  |
| 5  | Hino et al., 2006    | No description                                    | 13.4          | -                 |
| 6  | Ogawa et al., 2007   | G0 moths are mated within the same family         | 7.88 (28/355) | 3.99 <sup>a</sup> |
| 7  | Zhong et al., 2007   | G0 moths are backcrossed                          | 14.2 (46/324) | 14.2              |
|    |                      |                                                   | 2.62 (7/267)  | 2.62              |
|    |                      |                                                   | 1.72 (2/116)  | 1.72              |
| 8  | Wen et al., 2010     | G0 moths are mated randomly                       | 8.07 (13/161) | 4.03 <sup>a</sup> |
|    |                      |                                                   | 0 (0/112)     | 0 <sup>a</sup>    |
| 9  | Zhao et al., 2010    | G0 moths are mated with each other or backcrossed | 1.47 (1/68)   | 1.47              |
|    |                      |                                                   | 0.25 (1/400)  | 0.25              |
|    |                      |                                                   | 6.58 (5/76)   | 6.58              |
| 10 | Zhuang et            | G0 moths are                                      | 4.9 (18/367)  | 4.9               |

|    |                       |                                                                                   |                |                   |
|----|-----------------------|-----------------------------------------------------------------------------------|----------------|-------------------|
|    | al., 2010             | backcrossed                                                                       | 0 (0/32)       | 0                 |
|    |                       |                                                                                   | 18.5 (5/27)    | 18.5              |
| 11 | Sato et al.,<br>2012  | G0 moths are mated<br>with each other                                             | 4.3 (7/162)    | 2.15 <sup>a</sup> |
|    |                       |                                                                                   | 23.4 (11/47)   | 11.7 <sup>a</sup> |
| 12 | Jiang et al.,<br>2012 | G0 moths are mated<br>with each other or<br>backcrossed                           | 16.67 (1/6)    | -                 |
|    |                       |                                                                                   | 20.00 (1/5)    | -                 |
|    |                       |                                                                                   | 61.54 (8/13)   | -                 |
|    |                       |                                                                                   | 50.00 (1/2)    | -                 |
| 13 | Jiang et al.,<br>2013 | G0 moths are sibling<br>mated                                                     | 17.20 (5/29)   | 8.60 <sup>a</sup> |
|    |                       |                                                                                   | 5.88 (1/17)    | 2.94 <sup>a</sup> |
|    |                       |                                                                                   | 7.69 (1/13)    | 3.85 <sup>a</sup> |
|    |                       |                                                                                   | 7.17 (1/14)    | 3.59 <sup>a</sup> |
|    |                       |                                                                                   | 12.50 (1/8)    | 6.25 <sup>a</sup> |
|    |                       |                                                                                   | 8.33 (1/12)    | 4.17 <sup>a</sup> |
| 14 | Jiang et al.,<br>2014 | G0 moths are mated<br>with each other or<br>backcrossed to<br>nontransgenic moths | 29.77 (39/131) | -                 |
|    |                       |                                                                                   | 18.49 (27/146) | -                 |
|    |                       |                                                                                   | 27.50 (22/80)  | -                 |
|    |                       |                                                                                   | 13.56 (8/59)   | -                 |
|    |                       |                                                                                   | 38.67 (29/75)  | -                 |
|    |                       |                                                                                   | 11.63 (5/43)   | -                 |
|    |                       |                                                                                   | 9.68 (3/31)    | -                 |

|    |                         |                                                                      |                |                   |
|----|-------------------------|----------------------------------------------------------------------|----------------|-------------------|
|    |                         |                                                                      | 5.41 (2/37)    | -                 |
| 15 | Duan et al.,<br>2013    | G0 moths are<br>backcrossed                                          | 5.3 (1/19)     | 5.3               |
| 16 | Wang et al.,<br>2013    | G0 moths are sibling<br>mated                                        | 42.9 (9/21)    | 21.4 <sup>a</sup> |
|    |                         |                                                                      | 40.0 (8/20)    | 20.0 <sup>a</sup> |
|    |                         |                                                                      | 13.0 (3/23)    | 6.5 <sup>a</sup>  |
| 17 | Tan et al.,<br>2013     | G0 moths are<br>backcrossed                                          | 12.6 (12/95)   | 12.6              |
| 18 | Ma et al.,<br>2013      | Female G0 moths are<br>allowed to mate with<br>uninjected male moths | 57.61 (53/92)  | 57.61             |
|    |                         |                                                                      | 21.21 (14/66)  | 21.21             |
|    |                         |                                                                      | 2.00 (1/50)    | 2.00              |
|    |                         |                                                                      | 32.28 (92/285) | 32.28             |
| 19 | Deng et al.,<br>2013    | G0 moths are mated<br>with each other                                | 4.0 (5/126)    | 2.0 <sup>a</sup>  |
| 20 | Tsubota et<br>al., 2014 | No description                                                       | 8.9 (5/56)     | -                 |
|    |                         |                                                                      | 21.7 (13/60)   | -                 |
|    |                         |                                                                      | 11.4 (4/35)    | -                 |
| 21 | Xu et al.,<br>2014      | G0 moths are mated<br>with each other                                | 25 (2/8)       | 12.5 <sup>a</sup> |
| 22 | Xu et al.,<br>2014      | G0 moths are mated<br>with each other                                | 14.5 (16/110)  | 7.25 <sup>a</sup> |

|  |  |  |  |           |
|--|--|--|--|-----------|
|  |  |  |  | Mean: 8.8 |
|--|--|--|--|-----------|

Footnotes: <sup>a</sup> Transgenic G0 moths were mated with each other to generate G1 broods; the total G0 transgenic moths should include both male and female G0 moths, but in these studies, only G1 broods were counted (each G1 brood comes from a pair of male and female G0 moths) as the number of total G0 transgenic moths. Thus, the transposition efficiency is calibrated by halving the value.

“-”, inappropriate for statistical analysis, because these studies did not clearly indicate how many G0 moths were mated with each other or backcrossed to wild-type moths.

**Supplementary Table S2. The number of positive silkworms in each brood**

| <b>Transgenic silkworm strains</b> | <b>Positive individual number in broods</b> | <b>Transgenic silkworm strains</b> | <b>Positive individual number in broods</b> |
|------------------------------------|---------------------------------------------|------------------------------------|---------------------------------------------|
| ESNT-PB-HSA1                       | 33                                          | PB-HSA1                            | 4                                           |
| ESNT-PB-HSA2                       | 26                                          | PB-HSA2                            | 4                                           |
| ESNT-PB-HSA3                       | 31                                          | PB-HSA3                            | 8                                           |
| ESNT-PB-HSA4                       | 1                                           | PB-HSA4                            | 15                                          |
| ESNT-PB-HSA5                       | 2                                           | PB-HSA5                            | 2                                           |
| ESNT-PB-HSA6                       | 73                                          | PB-HSA6                            | 20                                          |
| ESNT-PB-HSA7                       | 10                                          | PB-HSA7                            | 13                                          |
| ESNT-PB-HSA8                       | 15                                          | PB-HSA8                            | 7                                           |
| ESNT-PB-HSA9                       | 4                                           | PB-HSA9                            | 15                                          |
| ESNT-PB-HSA10                      | 33                                          | PB-HSA10                           | 2                                           |
| ESNT-PB-HSA11                      | 8                                           | PB-HSA11                           | 2                                           |
| ESNT-PB-HSA12                      | 2                                           | PB-HSA12                           | 20                                          |
| ESNT-PB-HSA13                      | 6                                           | PB-HSA13                           | 11                                          |
| ESNT-PB-HSA14                      | 11                                          | PB-HSA14                           | 9                                           |
| ESNT-PB-HSA15                      | 14                                          | PB-HSA15                           | 2                                           |
| ESNT-PB-HSA16                      | 7                                           | PB-HSA16                           | 1                                           |
| ESNT-PB-HSA17                      | 53                                          | PB-HSA17                           | 72                                          |
| ESNT-PB-HSA18                      | 34                                          | PB-HSA18                           | 7                                           |



|               |    |          |    |
|---------------|----|----------|----|
| ESNT-PB-HSA19 | 2  | PB-HSA19 | 3  |
| ESNT-PB-HSA20 | 8  | PB-HSA20 | 2  |
| ESNT-PB-HSA21 | 6  | PB-HSA21 | 35 |
| ESNT-PB-HSA22 | 1  |          |    |
| ESNT-PB-HSA23 | 1  |          |    |
| ESNT-PB-HSA24 | 41 |          |    |
| ESNT-PB-HSA25 | 5  |          |    |
| ESNT-PB-HSA26 | 8  |          |    |
| ESNT-PB-HSA27 | 2  |          |    |
| ESNT-PB-HSA28 | 75 |          |    |
| ESNT-PB-HSA29 | 3  |          |    |
| ESNT-PB-HSA30 | 2  |          |    |
| ESNT-PB-HSA31 | 9  |          |    |
| ESNT-PB-HSA32 | 3  |          |    |
| ESNT-PB-HSA33 | 1  |          |    |
| ESNT-PB-HSA34 | 20 |          |    |
| ESNT-PB-HSA35 | 5  |          |    |
| ESNT-PB-HSA36 | 1  |          |    |
| ESNT-PB-HSA37 | 75 |          |    |
| ESNT-PB-HSA38 | 28 |          |    |
| ESNT-PB-HSA39 | 12 |          |    |

|                                                           |      |      |
|-----------------------------------------------------------|------|------|
| ESNT-PB-HSA40                                             | 4    |      |
| ESNT-PB-HSA41                                             | 32   |      |
| ESNT-PB-HSA42                                             | 18   |      |
| ESNT-PB-HSA43                                             | 2    |      |
| ESNT-PB-HSA44                                             | 23   |      |
| ESNT-PB-HSA45                                             | 5    |      |
| ESNT-PB-HSA46                                             | 10   |      |
| ESNT-PB-HSA47                                             | 11   |      |
| ESNT-PB-HSA48                                             | 45   |      |
| ESNT-PB-HSA49                                             | 92   |      |
| ESNT-PB-HSA50                                             | 4    |      |
| ESNT-PB-HSA51                                             | 4    |      |
| Average number<br>of positive<br>individuals in<br>broods | 18.1 | 12.1 |

**Supplementary Table S3. Insertion sites of ESNT-PB-200a and ESNT-PB-200b series transgenic strains**

| Transgenic strains | Hit chromosome position | Hit scaffold position | Insertion position | 5'-flanking genomic DNA sequence | Vector          | 3'-flanking genomic DNA sequence |
|--------------------|-------------------------|-----------------------|--------------------|----------------------------------|-----------------|----------------------------------|
| ESNT-PB-200a1      | Chr25                   | 144                   | Intergenic         | ATTCGATGTACCTTAA                 | <i>piggyBac</i> | TTAAACTTTTATGTATT                |
| ESNT-PB-200a3      | Chr19                   | 36                    | Intron             | AGACAATTTACATTAA                 | <i>piggyBac</i> | TTAACATTCCTTTTAA                 |
| ESNT-PB-200a4      | Chr18                   | 2                     | Intergenic         | AGTTTTTTATACTTAA                 | <i>piggyBac</i> | TTAAATAAATGGCTCT                 |
| ESNT-PB-200a5a     | Chr3                    | 63                    | Exon               | GCAGGTCCTCAATTAA                 | <i>piggyBac</i> | TTAAAAGCCGTATCG                  |
| ESNT-PB-200a5b     | Not clear               | 293                   | Intergenic         | GCTATTTACGAATTAA                 | <i>piggyBac</i> | TTAAAATAATTATTCG                 |
| ESNT-PB-200a6a     | Chr7                    | 45                    | Intergenic         | CAGTTTTTGCTTAA                   | <i>piggyBac</i> | TTAATTTTGACGTAT                  |
| ESNT-PB-200a6b     | Chr9                    | 87                    | Intron             | AAATCTGGTTTTTAA                  | <i>piggyBac</i> | TTAAAGAAGATACG                   |
| ESNT-PB-200a7a     | Chr22                   | 69                    | Intergenic         | GTGTGAAGTAGTAA                   | <i>piggyBac</i> | TTAAATAAAAATGTC                  |
| ESNT-PB-200a7b     | Chr18                   | 2                     | Intergenic         | GTTTTGATGTTATTAA                 | <i>piggyBac</i> | TTAAGGCTGTCCGC                   |

|                 |           |     |            |                            |                 |                         |
|-----------------|-----------|-----|------------|----------------------------|-----------------|-------------------------|
| ESNT-PB-200a8   | Chr18     | 2   | Intron     | TAAACATTGACAT <u>TAA</u>   | <i>piggyBac</i> | <u>TTAATACCTAGTCGA</u>  |
| ESNT-PB-200a9a  | Chr11     | 16  | Intron     | ACGTCAGCTATG <u>TAA</u>    | <i>piggyBac</i> | <u>TTAACGATGGATTTG</u>  |
| ESNT-PB-200a9b  | Chr4      | 5   | Intergenic | ACACTTAAGTATC <u>TAA</u>   | <i>piggyBac</i> | <u>TTAAGGTAGCGTCA</u>   |
| ESNT-PB-200a10a | Chr11     | 24  | Intergenic | AGCTTATCTATATAT <u>TAA</u> | <i>piggyBac</i> | <u>TTAATACGTGGCAA</u>   |
| ESNT-PB-200a10b | Chr13     | 1   | Intergenic | ATGCCAAATACCT <u>TAA</u>   | <i>piggyBac</i> | <u>TTAAATAAAACATAC</u>  |
| ESNT-PB-200a12  | Not clear | 317 | Intron     | CACTACTCACCT <u>TAA</u>    | <i>piggyBac</i> | <u>TTAAGGATGAAGCCA</u>  |
|                 | Chr25     | 89  | Intron     | GATCTATCTTATC <u>TAA</u>   | <i>piggyBac</i> | <u>TTAAATTAGATTGAA</u>  |
| ESNT-PB-200a13  | Chr3      | 17  | Intergenic | ACAGTTTTTCATAT <u>TAA</u>  | <i>piggyBac</i> | <u>TTAACTAGATTTTTA</u>  |
| ESNT-PB-200a14  | Chr23     | 31  | Exon       | TGTTCCAACCGAT <u>TAA</u>   | <i>piggyBac</i> | <u>TTAAATATTCTCTTC</u>  |
| ESNT-PB-200a15a | Chr9      | 41  | Intergenic | TCGCTGAATAAT <u>TAA</u>    | <i>piggyBac</i> | <u>TTAATCATCTAAGATA</u> |
|                 | Chr11     | 16  | Intergenic | CCATAGTTGCAT <u>TAA</u>    | <i>piggyBac</i> | <u>TTAAAGACATCTATC</u>  |
| ESNT-PB-200a16  | Not clear | 165 | Intron     | ATAAAAACAACAT <u>TAA</u>   | <i>piggyBac</i> | <u>TTAAATTTGTACAGTT</u> |

|                 |       |     |            |                             |                 |                          |
|-----------------|-------|-----|------------|-----------------------------|-----------------|--------------------------|
| ESNT-PB-200a17a | Chr25 | 144 | Intergenic | ATTCGATGTACCT <u>T</u> TAA  | <i>piggyBac</i> | <u>TTAA</u> ACTTTTATGTAT |
| ESNT-PB-200a17b | Chr12 | 6   | Intron     | ACCCCCCGACAT <u>T</u> TAA   | <i>piggyBac</i> | <u>TTAA</u> TACTCACAATA  |
|                 | Chr3  | 17  | Intergenic | TAAAAGCATT <u>T</u> TAA     | <i>piggyBac</i> | <u>TTAA</u> TTATGATTCTTA |
|                 | Chr25 | 89  | Intergenic | ATTTGATATTAT <u>T</u> TAA   | <i>piggyBac</i> | <u>TTAA</u> GTAGCAACGCT  |
| ESNT-PB-200a18  | Chr7  | 136 | Intron     | ATATTGCTTTGCT <u>T</u> TAA  | <i>piggyBac</i> | <u>TTAA</u> GGCTTCGTCAA  |
| ESNT-PB-200a19  | Chr16 | 124 | Intron     | CACTGTAGCTCT <u>T</u> TAA   | <i>piggyBac</i> | <u>TTAA</u> TTATAAACACAC |
| ESNT-PB-200a20  | Chr21 | 7   | Intergenic | TTTGGCTTCGTAAT <u>T</u> TAA | <i>piggyBac</i> | <u>TTAA</u> CGAAGAGTCCT  |
| ESNT-PB-200a21  | Chr26 | 34  | Intergenic | TCATTGCACCTAT <u>T</u> TAA  | <i>piggyBac</i> | <u>TTAA</u> TAGCCCGGTAC  |
| ESNT-PB-200a23  | Chr5  | 54  | Exon       | GTAAATAGTTTGT <u>T</u> TAA  | <i>piggyBac</i> | <u>TTAA</u> ATAAATGTTATT |
| ESNT-PB-200a24  | Chr7  | 15  | Intron     | AGTTTTTTTTTT <u>T</u> TAA   | <i>piggyBac</i> | <u>TTAA</u> TGAATAGAGAC  |
| ESNT-PB-200a25  | Chr12 | 6   | Intergenic | TAAAGTGT <u>T</u> TAA       | <i>piggyBac</i> | <u>TTAA</u> TGGTCTTAAAAA |
| ESNT-PB-200a26  | Chr14 | 81  | Intergenic | AACAATAATAT <u>T</u> TAA    | <i>piggyBac</i> | <u>TTAA</u> CAAAAGCATTTA |

|                 |           |     |            |                           |                 |                            |
|-----------------|-----------|-----|------------|---------------------------|-----------------|----------------------------|
| ESNT-PB-200a27  | Chr22     | 133 | Intron     | GTAAAGCTGCT <u>TTAA</u>   | <i>piggyBac</i> | <u>TTAAC</u> GTGTATTTCAGA  |
| ESNT-PB-200a28  | Chr18     | 2   | Intergenic | AATGCGCTACT <u>TTAA</u>   | <i>piggyBac</i> | <u>TTAAT</u> GACTTATAATAT  |
| ESNT-PB-200a29a | Chr16     | 4   | Intergenic | ACCATGTGTA <u>ACTTAA</u>  | <i>piggyBac</i> | <u>TTAAAA</u> CACTCTTGT    |
| ESNT-PB-200a29b | Chr6      | 49  | Intergenic | ACTCAGGGAGT <u>TTAA</u>   | <i>piggyBac</i> | <u>TTAAT</u> TGGAGAAGGTAG  |
| ESNT-PB-200a30  | Chr2      | 27  | Intergenic | TTATAATGTGAT <u>ATTAA</u> | <i>piggyBac</i> | <u>TTAAT</u> TGAATTTTGTTTT |
| ESNT-PB-200a31  | Chr19     | 60  | Intergenic | TTTCCTTATT <u>ATTAA</u>   | <i>piggyBac</i> | <u>TTAA</u> ACTGCGTCAGAC   |
| ESNT-PB-200a32a | Chr28     | 47  | Intergenic | TGGCATTGCT <u>CTTAA</u>   | <i>piggyBac</i> | <u>TTAA</u> AAGAAAGGCCGT   |
| ESNT-PB-200a32b | Not clear | 228 | Intergenic | ATATTATTTACT <u>TTTAA</u> | <i>piggyBac</i> | <u>TTAA</u> AAGACACGGACG   |
| ESNT-PB-200a33  | Chr22     | 18  | Intergenic | CTAAACATGG <u>CTTAA</u>   | <i>piggyBac</i> | <u>TTAA</u> ATAAATAAGGGT   |
| ESNT-PB-200a34a | Chr24     | 43  | Intergenic | TAATTCACGT <u>ATTAA</u>   | <i>piggyBac</i> | <u>TTAA</u> ACAAGTTATTTA   |
| ESNT-PB-200a34b | Chr12     | 119 | Intron     | GAGACTGTTCT <u>TTTAA</u>  | <i>piggyBac</i> | <u>TTAA</u> ATTCTAAATAAT   |
| ESNT-PB-200a35a | Chr1      | 26  | Intergenic | TAACAATTTTGT <u>TTAA</u>  | <i>piggyBac</i> | <u>TTAA</u> AAGAAATCGGCT   |

|                 |       |    |            |                           |                 |                           |
|-----------------|-------|----|------------|---------------------------|-----------------|---------------------------|
| ESNT-PB-200a35b | Chr12 | 6  | Intergenic | CTATTAGGTA <u>CTTTAA</u>  | <i>piggyBac</i> | <u>TTAA</u> ATAATCGTTTTTC |
| ESNT-PB-200a36  | Chr15 | 64 | Intergenic | CCTCCTGATCC <u>ATTAA</u>  | <i>piggyBac</i> | <u>TTAAC</u> GGTGCTTTTA   |
| ESNT-PB-200a37  | Chr20 | 99 | Intergenic | TGTTTCGCTTCTG <u>TTAA</u> | <i>piggyBac</i> | <u>TTAAT</u> GAAAATAACC   |
| ESNT-PB-200b1   | Chr13 | 1  | Intergenic | TTCATTATATG <u>TTTAA</u>  | <i>piggyBac</i> | <u>TTAA</u> ATACAAAGACTC  |
| ESNT-PB-200b2   | Chr15 | 42 | Intron     | ACAGTGCCAAT <u>TTTTAA</u> | <i>piggyBac</i> | <u>TTAAAA</u> AAAATGTATT  |
| ESNT-PB-200b4   | Chr20 | 99 | Intergenic | ATTCTGGCAGCT <u>TTAA</u>  | <i>piggyBac</i> | <u>TTAATA</u> ACAATTGTAT  |
| ESNT-PB-200b5   | Chr18 | 2  | Intron     | GGATCTACACT <u>ATTAA</u>  | <i>piggyBac</i> | <u>TTAA</u> ATTAATAGGGTT  |
| ESNT-PB-200b6   | Chr9  | 77 | Intron     | CCTTTAATATTG <u>CTTAA</u> | <i>piggyBac</i> | <u>TTAAT</u> TGAATGCGAA   |
| ESNT-PB-200b7   | Chr19 | 60 | Intergenic | TTTCCTTATTAT <u>TTAA</u>  | <i>piggyBac</i> | <u>TTAA</u> ACTGCGTCAGAC  |
| ESNT-PB-200b8   | Chr8  | 58 | Intergenic | ACGTGAACTACT <u>TTAA</u>  | <i>piggyBac</i> | <u>TTAAT</u> TATTCACAGTC  |
| ESNT-PB-200b10  | Chr15 | 3  | Intergenic | ATCGTGAAAAGC <u>TTAA</u>  | <i>piggyBac</i> | <u>TTAA</u> AGCATAAACTA   |
| ESNT-PB-200b11  | Chr11 | 16 | Intergenic | ACCGTTAACGCCA <u>TTAA</u> | <i>piggyBac</i> | <u>TTAA</u> CACAGAATCTT   |

|                |           |     |            |                            |                 |                         |
|----------------|-----------|-----|------------|----------------------------|-----------------|-------------------------|
| ESNT-PB-200b12 | Chr1      | 142 | Intergenic | TTACAAAACCATCT <u>TTAA</u> | <i>piggyBac</i> | <u>TTAAAGCCAATATGG</u>  |
| ESNT-PB-200b13 | Chr8      | 19  | Exon       | TTATGATATTTGTT <u>TTAA</u> | <i>piggyBac</i> | <u>TTAAGTTTGTAAT</u>    |
| ESNT-PB-200b14 | Not clear | 192 | Intergenic | TGATAAAACTGTAT <u>TTAA</u> | <i>piggyBac</i> | <u>TTAAAATATTTTTGAC</u> |
| ESNT-PB-200b15 | Chr15     | 3   | Intergenic | CTTGATAACTTGTT <u>TTAA</u> | <i>piggyBac</i> | <u>TTAAAGGATTCTTTAG</u> |
| ESNT-PB-200b16 | Chr18     | 2   | Intron     | TATGCATACATACT <u>TTAA</u> | <i>piggyBac</i> | <u>TTAAGGTCAATCGGG</u>  |
|                | Chr21     | 7   | Intergenic | CAACTAACCGCT <u>TTAA</u>   | <i>piggyBac</i> | <u>TTAAAGACACAACAA</u>  |
| ESNT-PB-200b17 | Chr22     | 61  | Intergenic | GTTGTGTTGTTTT <u>TTAA</u>  | <i>piggyBac</i> | <u>TTAAAACGGTTTTTTT</u> |
| ESNT-PB-200b18 | Chr14     | 81  | Intergenic | TTAAAACATTTTT <u>TTAA</u>  | <i>piggyBac</i> | <u>TTAAATAAGTAATTC</u>  |
| ESNT-PB-200b19 | Chr17     | 114 | Intergenic | CAACAATGTCGCT <u>TTAA</u>  | <i>piggyBac</i> | <u>TTAAACTTAATAGCCT</u> |
| ESNT-PB-200b20 | Chr21     | 181 | Intergenic | AATCACTATTATG <u>TTAA</u>  | <i>piggyBac</i> | <u>TTAATTGGTGTGGAT</u>  |
| ESNT-PB-200b21 | Chr15     | 64  | Intron     | CGGTACGTTTGTG <u>TTAA</u>  | <i>piggyBac</i> | <u>TTAACTAGTTCGCGC</u>  |
| ESNT-PB-200b22 | Chr17     | 154 | Exon       | ATGCAAAACACT <u>TTAA</u>   | <i>piggyBac</i> | <u>TTAATGAGTATTGATA</u> |



|                 |      |    |            |                         |                 |                         |
|-----------------|------|----|------------|-------------------------|-----------------|-------------------------|
| ESNT-PB-200b23a | Chr9 | 14 | Intergenic | TCAAAGGCAAC <u>TTAA</u> | <i>piggyBac</i> | <u>TTA</u> AGGGAACGTACC |
| ESNT-PB-200b23b | Chr4 | 13 | Intergenic | CAGTGTTTGT <u>TTTAA</u> | <i>piggyBac</i> | <u>TTA</u> AAAAAAAAAACA |

## References

- 1 Tamura, T. *et al.* Germline transformation of the silkworm *Bombyx mori* L. using a piggyBac transposon-derived vector. *Nat Biotechnol* **18**, 81-84 (2000).
- 2 Tomita, M. *et al.* Transgenic silkworms produce recombinant human type III procollagen in cocoons. *Nat Biotechnol* **21**, 52-56 (2003).
- 3 Imamura, M. *et al.* Targeted gene expression using the GAL4/UAS system in the silkworm *Bombyx mori*. *Genetics* **165**, 1329-1340 (2003).
- 4 Adachi, T., Tomita, M., Shimizu, K., Ogawa, S. & Yoshizato, K. Generation of hybrid transgenic silkworms that express *Bombyx mori* prolyl-hydroxylase alpha-subunits and human collagens in posterior silk glands: Production of cocoons that contained collagens with hydroxylated proline residues. *J Biotechnol* **126**, 205-219 (2006).
- 5 Hino, R., Tomita, M. & Yoshizato, K. The generation of germline transgenic silkworms for the production of biologically active recombinant fusion proteins of fibroin and human basic fibroblast growth factor. *Biomaterials* **27**, 5715-5724 (2006).
- 6 Ogawa, S., Tomita, M., Shimizu, K. & Yoshizato, K. Generation of a transgenic silkworm that secretes recombinant proteins in the sericin layer of cocoon: production of recombinant human serum albumin. *J Biotechnol* **128**, 531-544 (2007).
- 7 Zhong, B., Li, J., Chen, J., Ye, J. & Yu, S. Comparison of transformation efficiency of piggyBac transposon among three different silkworm *Bombyx*

- mori Strains. *Acta Biochim Biophys Sin (Shanghai)* **39**, 117-122 (2007).
- 8 Wen, H. *et al.* Transgenic silkworms (*Bombyx mori*) produce recombinant spider dragline silk in cocoons. *Mol Biol Rep* **37**, 1815-1821 (2010).
- 9 Zhao, A. C. *et al.* New and highly efficient expression systems for expressing selectively foreign protein in the silk glands of transgenic silkworm. *Transgenic Res* **19**, 29-44 (2010).
- 10 Zhuang, L., Wei, H., Lu, C. & Zhong, B. The relationship between internal domain sequences of piggyBac and its transposition efficiency in BmN cells and *Bombyx mori*. *Acta Biochim Biophys Sin (Shanghai)* **42**, 426-431 (2010).
- 11 Sato, M. *et al.* Production of scFv-Conjugated Affinity Silk Powder by Transgenic Silkworm Technology. *PLoS One* **7** (2012).
- 12 Jiang, L. *et al.* Resistance to BmNPV via Overexpression of an Exogenous Gene Controlled by an Inducible Promoter and Enhancer in Transgenic Silkworm, *Bombyx mori*. *PLoS One* **7** (2012).
- 13 Jiang, L. *et al.* Identification of a midgut-specific promoter in the silkworm *Bombyx mori*. *Biochem Bioph Res Co* **433**, 542-546 (2013).
- 14 Jiang, L. *et al.* Postintegration stability of the silkworm piggyBac transposon. *Insect Biochem Molec* **50**, 18-23 (2014).
- 15 Duan, J. P. *et al.* Novel female-specific trans-spliced and alternative splice forms of dsx in the silkworm *Bombyx mori*. *Biochem Bioph Res Co* **431**, 630-635 (2013).
- 16 Wang, F. *et al.* An optimized sericin-1 expression system for mass-producing

recombinant proteins in the middle silk glands of transgenic silkworms.

*Transgenic Res* **22**, 925-938 (2013).

- 17 Tan, A. J. *et al.* Transgene-based, female-specific lethality system for genetic sexing of the silkworm, *Bombyx mori*. *P Natl Acad Sci USA* **110**, 6766-6770 (2013).
- 18 Ma, S. Y. *et al.* Genetic marking of sex using a W chromosome-linked transgene. *Insect Biochem Molec* **43**, 1079-1086 (2013).
- 19 Deng, D. J. *et al.* The promoter of *Bmlp3* gene can direct fat body-specific expression in the transgenic silkworm, *Bombyx mori*. *Transgenic Res* **22**, 1055-1063 (2013).
- 20 Tsubota, T. *et al.* Establishment of transgenic silkworms expressing GAL4 specifically in the haemocyte oenocytoid cells. *Insect Molecular Biology* **23**, 165-174 (2014).
- 21 Xu, H. F. *et al.* Overexpression and functional characterization of an *Aspergillus niger* phytase in the fat body of transgenic silkworm, *Bombyx mori*. *Transgenic Res* **23**, 669-677 (2014).
- 22 Xu, H. F. *et al.* Overexpression of recombinant infectious bursal disease virus (IBDV) capsid protein VP2 in the middle silk gland of transgenic silkworm. *Transgenic Res* **23**, 809-816 (2014).
